# Supplementary material
Source: publisher site journal article supplement (https://www.dovepress.com/article/392535)
Supplement: Supplementary file 1 [file get_supplementary_file.php]

## Medicines involved

**Andrographolide:** Andrographolide is a NF- $\kappa$ B inhibitor.

Reference: Zhai ZJ, Li HW, Liu GW, Qu XH, Tian B, Yan W, Lin Z, Tang TT, Qin A, Dai KR. Andrographolide suppresses RANKL-induced osteoclastogenesis in vitro and prevents inflammatory bone loss in vivo. *Br J Pharmacol.* 2014 Feb;171(3):663-75. doi: 10.1111/bph.12463. PMID: 24125472; PMCID: PMC3969079.

**N-acetylcysteine (NAC):** N-acetylcysteine is a cysteine precursor and a ROS inhibitor.

Reference: Halasi M, Wang M, Chavan TS, Gaponenko V, Hay N, Gartel AL. ROS inhibitor N-acetyl-L-cysteine antagonizes the activity of proteasome inhibitors. *Biochem J.* 2013 Sep 1;454(2):201-8. doi: 10.1042/BJ20130282. PMID: 23772801; PMCID: PMC4322432.

**Zinc protoporphyrin (ZnPP) :** ZnPP is an orally active, competitive inhibitor of heme oxygenase-1 (HO-1).

Reference: Park C, Cha HJ, Hong SH, Kim GY, Kim S, Kim HS, Kim BW, Jeon YJ, Choi YH. Protective Effect of Phloroglucinol on Oxidative Stress-Induced DNA Damage and Apoptosis through Activation of the Nrf2/HO-1 Signaling Pathway in HaCaT Human Keratinocytes. *Mar Drugs.* 2019 Apr 13;17(4):225. doi: 10.3390/md17040225. PMID: 31013932; PMCID: PMC6520966.

**tert-butylhydroquinone (TBHQ):** TBHQ is a widely used Nrf2 activator, protects against Doxorubicin (DOX)-induced cardiotoxicity through activation of Nrf2.

Reference: Wang LF, Su SW, Wang L, Zhang GQ, Zhang R, Niu YJ, Guo YS, Li CY, Jiang WB, Liu Y, Guo HC. Tert-butylhydroquinone ameliorates doxorubicin-induced cardiotoxicity by activating Nrf2 and inducing the expression of its target genes. *Am J Transl Res.* 2015 Oct 15;7(10):1724-35. PMID: 26692920; PMCID: PMC4656753.

**retinoic acid (RA):** Retinoic acid is a metabolite of vitamin A and plays an important role in cell growth, differentiation and organogenesis. retinoic acid can inhibit the transcription factor Nrf2 by activating the retinoic acid receptor.

Reference: Wang XJ, Hayes JD, Henderson CJ, Wolf CR. Identification of retinoic acid as an inhibitor of transcription factor Nrf2 through activation of retinoic acid receptor alpha. *Proc Natl Acad Sci U S A.* 2007 Dec 4;104(49):19589-94. doi: 10.1073/pnas.0709483104. Epub 2007 Nov 28. PMID: 18048326; PMCID: PMC2148333.

**ASTX029:** ASTX029 is a potent dual ERK1/2 inhibitor. ASTX029 has anti-cancer activity.

Reference: Heightman TD, Berdini V, Bevan L, Buck IM, Carr MG, Courtin A, Coyle JE, Day JEH, East C, Fazal L, Griffiths-Jones CM, Howard S, Kucia-Tran J, Martins V, Muench S, Munck JM, Norton D, O'Reilly M, Palmer N, Pathuri P, Peakman TM, Reader M, Rees DC, Rich SJ, Shah A, Wallis NG, Walton H, Wilsher NE, Woolford AJ, Cooke M, Cousin D, Onions S, Shannon J, Watts J, Murray CW. Discovery of ASTX029, A Clinical Candidate Which Modulates the Phosphorylation and Catalytic Activity of ERK1/2. *J Med Chem.* 2021 Aug 26;64(16):12286-12303. doi: 10.1021/acs.jmedchem.1c00905. Epub 2021 Aug 13. PMID: 34387469.

**SP600125:** SP600125 is an orally active, reversible, and ATP-competitive JNK inhibitor.

Reference: Bennett BL, Sasaki DT, Murray BW, O'Leary EC, Sakata ST, Xu W, Leisten JC, Motiwala A, Pierce S, Satoh Y, Bhagwat SS, Manning AM, Anderson DW. SP600125, an anthrapyrazolone inhibitor of Jun N-terminal kinase. *Proc Natl Acad Sci U S A*. 2001 Nov 20;98(24):13681-6. doi: 10.1073/pnas.251194298. PMID: 11717429; PMCID: PMC61101.

**TAK-715:** TAK-715 is an orally active and potent p38 MAPK inhibitor.

Reference: Miwatashi S, Arikawa Y, Kotani E, Miyamoto M, Naruo K, Kimura H, Tanaka T, Asahi S, Ohkawa S. Novel inhibitor of p38 MAP kinase as an anti-TNF-alpha drug: discovery of N-[4-[2-ethyl-4-(3-methylphenyl)-1,3-thiazol-5-yl]-2-pyridyl]benzamide (TAK-715) as a potent and orally active anti-rheumatoid arthritis agent. *J Med Chem*. 2005 Sep 22;48(19):5966-79. doi: 10.1021/jm050165o. PMID: 16162000.

Table S1 OD value and value-added activity of NPC in each group

| Groups             | Blanks | CTR      | 24h      | 48h      |
|--------------------|--------|----------|----------|----------|
| OD value           | 0.2109 | 2.8708   | 2.637    | 2.7726   |
|                    | 0.2298 | 2.414    | 2.5336   | 2.7749   |
|                    | 0.217  | 2.0945   | 2.6401   | 2.3383   |
|                    | 0.2224 | 2.1539   | 2.866    | 2.6843   |
|                    | 0.2201 | 2.5265   | 2.3736   | 2.1558   |
| Cell viability (%) |        | 121.3513 | 91.2102  | 96.3081  |
|                    |        | 99.6487  | 105.4757 | 116.5232 |
|                    |        | 85.6563  | 129.0599 | 112.9854 |
|                    |        | 88.1199  | 136.8677 | 127.4605 |
| Mean value         |        | 100      | 111.1968 | 107.4409 |
| Standard deviation |        | 12.8854  | 18.5906  | 15.4327  |
| P-value            |        |          | 0.3512   | 0.4803   |

P value indicates comparison with the CTR group. CTR means control.

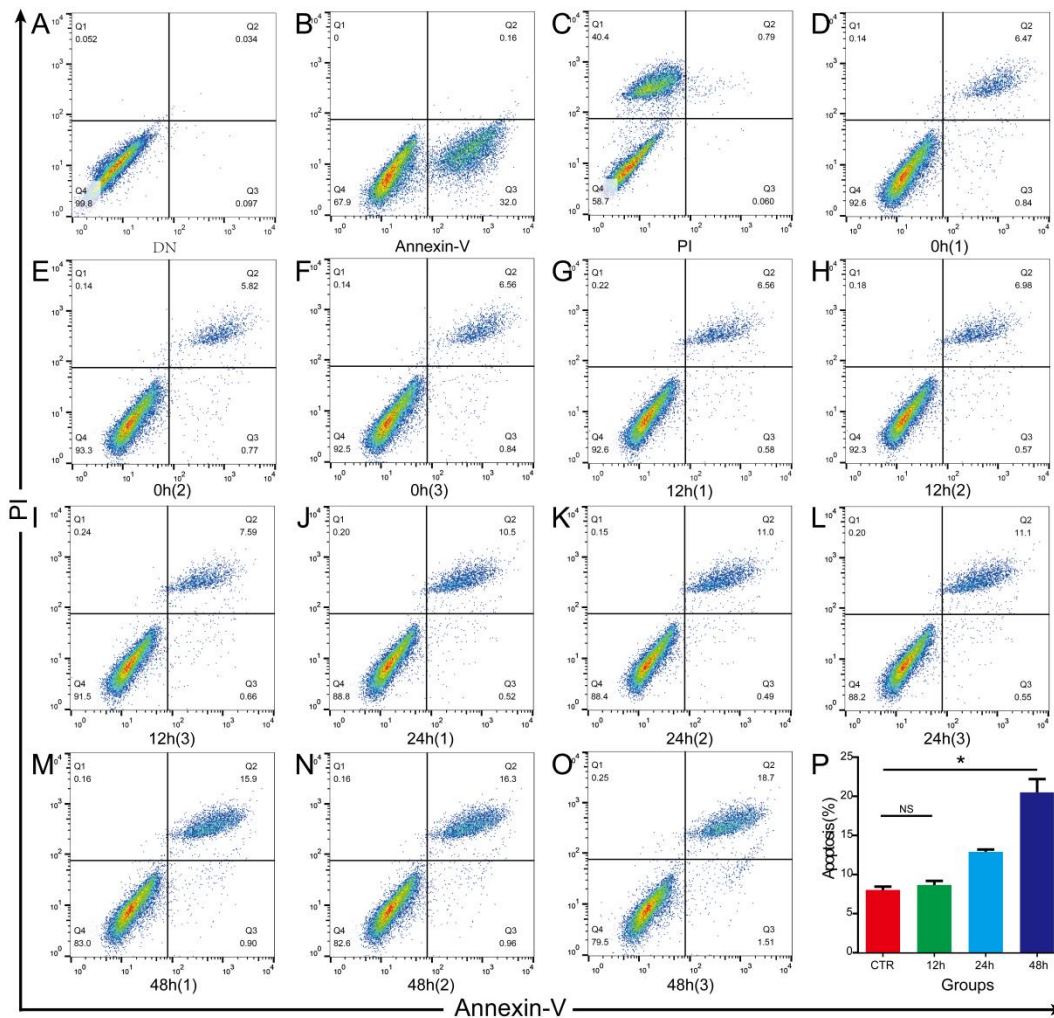

Figure S1. Apoptosis rate of NPC in each group. (A) Double negative control group. (B) Annexin-V control group. (C) PI control group. (D-F) 0 h groups. (G-I) 12 h groups. (J-L) 24 h groups. (M-O) 48 h groups. (P) Apoptosis rate of NPC in each group. NPC: nucleus pulposus cell. DN: double negative. NS: non-significant. \*P < 0.05.

Table S2 Apoptosis rate of NPC in each group

| Groups                   | 0h    | 12h   | 24h    | 48h    |
|--------------------------|-------|-------|--------|--------|
| Total apoptosis rate (%) | 7.310 | 7.140 | 11.020 | 16.800 |
|                          | 6.590 | 7.550 | 11.490 | 17.260 |
|                          | 7.400 | 8.250 | 11.650 | 20.210 |
| Mean value               | 7.100 | 7.647 | 11.387 | 18.090 |
| Standard deviation       | 0.362 | 0.658 | 0.267  | 1.511  |
| P-value                  |       | 0.256 | 0.001  | 0.003  |

P value indicates comparison with the 0h group.

Table S3 OD value and value-added activity of NPC in each group

| Groups             | Blanks   | 0 $\mu$ M | 5 $\mu$ M | 10 $\mu$ M | 15 $\mu$ M | 20 $\mu$ M | 25 $\mu$ M | 30 $\mu$ M |
|--------------------|----------|-----------|-----------|------------|------------|------------|------------|------------|
| OD value           | 0.2919   | 2.2214    | 2.1178    | 2.2337     | 1.9302     | 1.9907     | 1.7873     | 1.8131     |
|                    | 0.2891   | 2.2933    | 2.2788    | 2.1732     | 2.1763     | 2.016      | 1.8704     | 1.9239     |
|                    | 0.3079   | 2.2154    | 2.3409    | 2.4438     | 2.0373     | 1.9405     | 1.7188     | 1.6795     |
|                    | 0.2854   | 2.3858    | 2.4385    | 2.2181     | 2.1916     | 2.2305     | 1.5372     | 1.5627     |
|                    | 0.2755   | 2.2949    | 2.428     | 2.4259     | 2.0226     | 1.8831     | 1.6289     | 1.6171     |
|                    | 0.2769   | 2.2696    | 2.3718    | 2.282      | 2.0333     | 1.9242     | 1.9348     | 1.8075     |
| Cell viability (%) | 96.8500  | 94.6300   | 100.6400  | 84.9100    | 88.0400    | 77.5000    | 78.8400    | 96.8500    |
|                    | 100.6000 | 99.2800   | 94.0100   | 94.1600    | 86.1600    | 78.9000    | 81.5700    | 100.6000   |
|                    | 95.7400  | 106.5800  | 111.9700  | 90.6600    | 85.5900    | 73.9700    | 71.9100    | 95.7400    |
|                    | 105.4300 | 102.5100  | 92.0200   | 90.7500    | 92.6100    | 59.6000    | 60.8100    | 105.4300   |
|                    | 101.3600 | 106.5900  | 106.4900  | 86.5200    | 79.6100    | 67.0200    | 66.4400    | 101.3600   |
|                    | 100.0200 | 105.1300  | 100.6200  | 88.1400    | 82.6700    | 83.2000    | 76.8100    | 100.0200   |
| Mean value         |          | 100.0000  | 102.4500  | 100.9600   | 89.1900    | 85.7800    | 73.3600    | 72.7300    |
| Standard deviation |          | 3.1500    | 3.9800    | 5.3500     | 6.2300     | 7.9900     | 14.6100    | 14.7300    |
| P-value            |          |           | 0.3302    | 0.782      | 0.0003     | 0.0001     | 0.0000     | 0.0000     |

P value indicates comparison with the 0 $\mu$ M group.

Table S4 OD value and value-added activity of NPC in each group

| Groups             | Blanks | CTR      | PRE     | ADR+PRE | NAC+PRE |
|--------------------|--------|----------|---------|---------|---------|
| OD value           | 0.2653 | 2.5811   | 1.4289  | 2.0431  | 2.0789  |
|                    | 0.2609 | 2.5538   | 1.6176  | 2.0524  | 1.8575  |
|                    | 0.2643 | 2.5764   | 1.5382  | 1.9813  | 2.0888  |
|                    | 0.2703 | 2.4632   | 1.4415  | 1.9727  | 2.0298  |
|                    | 0.2741 | 2.5584   | 1.5096  | 1.9416  | 1.9160  |
|                    | 0.2634 | 2.5969   | 1.4969  | 1.8574  | 1.8542  |
| Cell viability (%) |        | 101.1900 | 50.2500 | 76.7700 | 78.3100 |
|                    |        | 100.1900 | 59.1700 | 78.1300 | 69.6300 |
|                    |        | 101.0300 | 55.1000 | 74.2600 | 78.9100 |
|                    |        | 95.8200  | 53.4100 | 77.6300 | 80.2400 |
|                    |        | 99.8100  | 54.0900 | 73.0000 | 71.8800 |
|                    |        | 101.9600 | 52.8600 | 68.3100 | 68.1700 |
| Mean value         |        | 100.0000 | 54.1400 | 74.6800 | 74.5200 |
| Standard deviation |        | 1.9900   | 2.6900  | 3.3800  | 4.7900  |
| *P-value           |        |          | 0.0000  | 0.0000  | 0.0000  |
| #P-value           |        |          |         | 0.0000  | 0.0000  |

\*P values indicate comparison with CTR group; #P values indicate comparison with PRE group.

CTR: control, PRE: pressure, ADR: andrographolide, NAC: N-acetylcysteine.

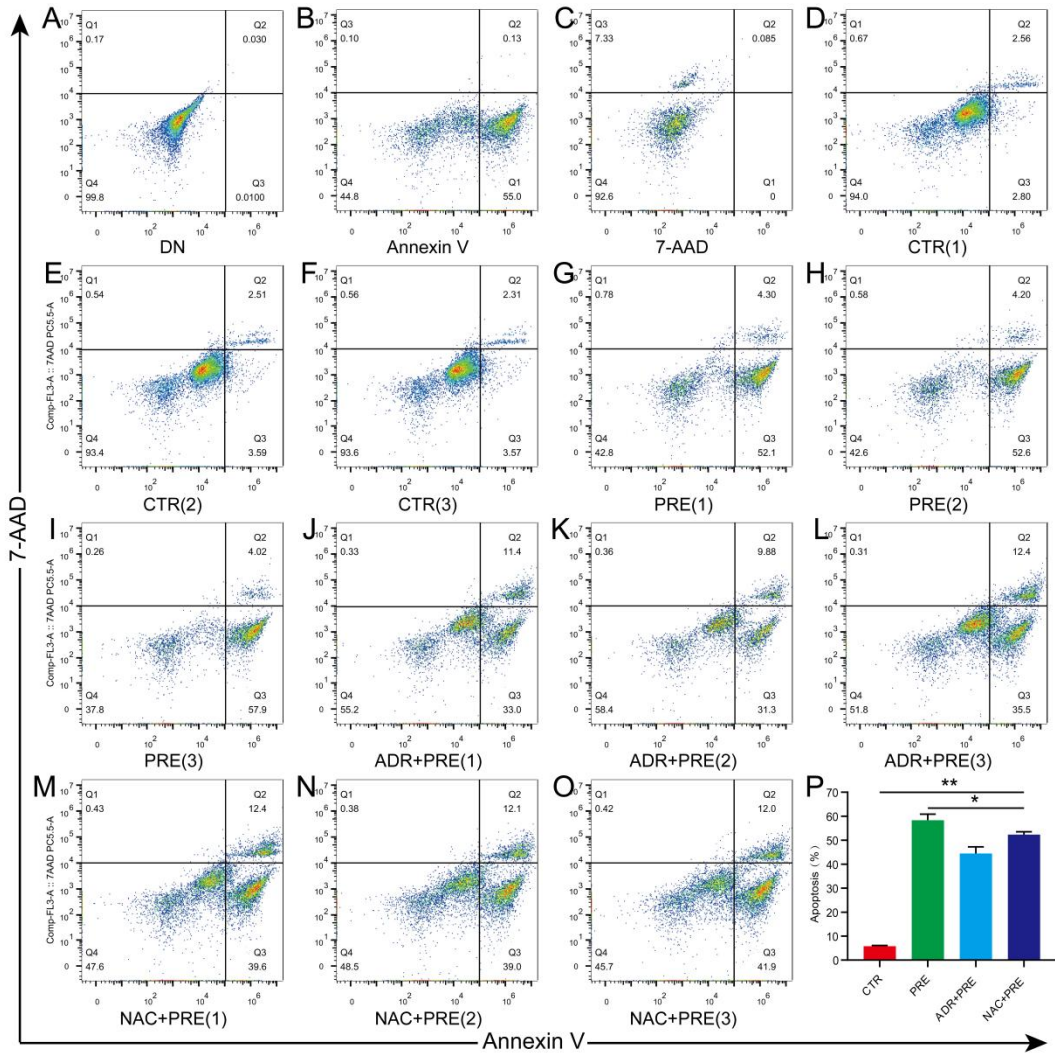

Figure S2. Apoptosis rate of NPC in each group. (A) Double negative control group. (B) Annexin-V control group. (C) 7-AAD control group. (D-F) Control groups. (G-I) RRE groups. (J-L) ADR+PRE groups. (M-O) NAC+PRE groups. (P) Apoptosis rate of NPC in each group. ADR: andrographolide, NPC: nucleus pulposus cell, NAC: N-acetylcysteine, DN: double negative. CTR: control, PRE: pressure. NS: non-significant. \*P < 0.05. \*\*P < 0.01.

Table S5 Fluorescence intensity of each group of NPC

| Groups                 | CTR  | PRE    | ADR+PRE | NAC+PRE | ROSup  |
|------------------------|------|--------|---------|---------|--------|
|                        | 7619 | 24389  | 22373   | 20937   | 27262  |
|                        | 7955 | 26693  | 23147   | 22485   | 26854  |
| Fluorescence intensity | 9336 | 26789  | 21519   | 24275   | 27951  |
|                        | 9552 | 30939  | 20709   | 23270   | 29823  |
|                        | 8518 | 27289  | 24236   | 21791   | 30262  |
|                        | 8562 | 29656  | 25784   | 22376   | 29407  |
| Mean value             | 8590 | 27625  | 22961   | 22522   | 28593  |
| Standard deviation     | 687  | 2132   | 1690    | 1057    | 1302   |
| *P-value               |      | 0.0000 | 0.0000  | 0.0000  | 0.0000 |
| #P-value               |      |        | 0.0033  | 0.0007  | 0.4068 |

\*P values indicate comparison with CTR group; #P values indicate comparison with PRE group. CTR: control, PRE: pressure, ADR: andrographolide, NAC: N-acetylcysteine, ROSup: reactive oxygen species positive control reagent.

Table S6 Apoptosis rate of NPC in each group

| Groups                   | CTR   | PRE    | ADR+PRE | NAC+PRE |
|--------------------------|-------|--------|---------|---------|
|                          | 5.360 | 56.400 | 44.400  | 52.000  |
| Total apoptosis rate (%) | 6.100 | 56.800 | 41.180  | 51.100  |
|                          | 5.880 | 61.920 | 47.900  | 53.900  |
| Mean value               | 5.780 | 58.373 | 44.493  | 52.333  |
| Standard deviation       | 0.310 | 2.513  | 2.744   | 1.167   |
| *P-value                 |       | 0.000  | 0.000   | 0.000   |
| #P-value                 |       |        | 0.006   | 0.037   |

\*P values indicate comparison with CTR group; #P values indicate comparison with PRE group. CTR: control, PRE: pressure, ADR: andrographolide, NAC: N-acetylcysteine.

Table S7 Analysis of grayscale values of each group of strips

| Groups                 | 0h     | 2h     | 4h     | 8h     |
|------------------------|--------|--------|--------|--------|
|                        | 0.1332 | 0.4661 | 1.0854 | 1.5449 |
| HO-1/ $\beta$ -Actin   | 0.0602 | 0.3727 | 1.3112 | 1.7785 |
|                        | 0.0584 | 0.1801 | 0.807  | 1.8634 |
| Mean value             | 0.0839 | 0.3396 | 1.0679 | 1.7289 |
| Standard deviation     | 0.0348 | 0.1191 | 0.2062 | 0.1347 |
| P-value                |        | 0.0435 | 0.0026 | 0.0001 |
|                        | 0.0413 | 0.1927 | 0.6593 | 0.9577 |
| p-Nrf2/ $\beta$ -Actin | 0.0495 | 0.3148 | 0.7808 | 1.2959 |
|                        | 0.1509 | 0.3517 | 1.2908 | 2.1012 |
| Mean value             | 0.0806 | 0.2864 | 0.9103 | 1.4516 |
| Standard deviation     | 0.0498 | 0.0679 | 0.2736 | 0.4796 |
| P-value                |        | 0.026  | 0.0135 | 0.0159 |
|                        | 0.3209 | 0.1379 | 0.1102 | 0.151  |
| Nrf2/ $\beta$ -Actin   | 0.5834 | 0.7938 | 0.694  | 0.8512 |
|                        | 1.3066 | 0.4333 | 0.7166 | 0.9986 |
| Mean value             | 0.737  | 0.455  | 0.5069 | 0.6669 |
| Standard deviation     | 0.4168 | 0.2682 | 0.2807 | 0.3698 |
| P-value                |        | 0.4662 | 0.5526 | 0.8675 |

P-values indicate comparison with 0h group.

Table S8 Analysis of grayscale values of each group of strips

| Groups               | CTR    | PRE    | ADR    | ZnPP   | ADR+PRE | ZnPP+PRE | ADR+ZnPP+PRE |
|----------------------|--------|--------|--------|--------|---------|----------|--------------|
|                      | 0.652  | 0.9098 | 2.3057 | 0.0987 | 2.5821  | 0.4329   | 0.2531       |
| HO-1/ $\beta$ -Actin | 0.2232 | 0.3303 | 1.2624 | 0.0761 | 1.4017  | 0.1205   | 0.1526       |
|                      | 0.1063 | 0.1797 | 1.4353 | 0.0248 | 2.0013  | 0.1044   | 0.0948       |
| Mean value           | 0.3271 | 0.4733 | 1.6678 | 0.0665 | 1.995   | 0.2193   | 0.1668       |
| Standard deviation   | 0.2346 | 0.3147 | 0.4566 | 0.0309 | 0.4819  | 0.1512   | 0.0654       |
| *P-value             |        | 0.6264 | 0.021  | 0.1943 | 0.0117  | 0.6138   | 0.4046       |
| #P-value             |        |        | 0.0382 | 0.1431 | 0.0201  | 0.3618   | 0.2489       |
| §P-value             |        |        |        |        |         | 0.0076   | 0.006        |

\*P-values indicate comparison with CTR group; #P-values indicate comparison with PRE group; §P-values indicate comparison with ADR+ PRE group. CTR: control, PRE: pressure, ADR: andrographolide, ZnPP: HO-1 inhibitor.



Table S9 Fluorescence intensity of each group of NPC

| Groups                 | CTR  | PRE    | ADR    | ZnPP   | ADR+PRE | ZnPP+PRE | ADR+ZnPP+PRE | ROSup  |
|------------------------|------|--------|--------|--------|---------|----------|--------------|--------|
|                        | 7106 | 27720  | 8365   | 8361   | 21043   | 29328    | 26280        | 29034  |
|                        | 7356 | 29411  | 8513   | 7688   | 19600   | 25604    | 28413        | 28540  |
| Fluorescence intensity | 7162 | 26500  | 8396   | 8840   | 19132   | 28363    | 27437        | 29083  |
|                        | 7735 | 27377  | 7546   | 8000   | 19220   | 27351    | 29751        | 31828  |
|                        | 7135 | 29748  | 7547   | 8591   | 18905   | 28740    | 28975        | 31305  |
|                        | 8968 | 27523  | 8234   | 7458   | 20031   | 29502    | 28684        | 30553  |
| Mean value             | 7577 | 28046  | 8100   | 8156   | 19655   | 28148    | 28256        | 30057  |
| Standard deviation     | 658  | 1153   | 399    | 488    | 718     | 1337     | 1120         | 1240   |
| *P-value               |      | 0.0000 | 0.1596 | 0.1449 | 0.0000  | 0.0000   | 0.0000       | 0.0000 |
| #P-value               |      |        |        |        | 0.0000  | 0.9002   | 0.7761       | 0.0241 |
| §P-value               |      |        |        |        |         | 0.0000   | 0.0000       | 0.0000 |

\*P-values indicate comparison with CTR group; #P-values indicate comparison with PRE group;

§P-values indicate comparison with ADR+PRE group. CTR: control, PRE: pressure, ADR:

andrographolide, ZnPP: HO-1 inhibitor, ROSup: reactive oxygen species positive control reagent.

Table S10 Analysis of grayscale values of each group of strips

| Groups                 | CTR    | ADR    | TBHQ   | RA     | ADR+TBHQ | ADR+RA |
|------------------------|--------|--------|--------|--------|----------|--------|
|                        | 0.0233 | 0.8352 | 0.309  | 0.01   | 0.6508   | 0.0995 |
| HO-1/ $\beta$ -Actin   | 0.0568 | 1.0099 | 0.5441 | 0.0575 | 0.9889   | 0.0614 |
|                        | 0.0492 | 0.9616 | 0.3888 | 0.0281 | 0.7427   | 0.1335 |
| Mean value             | 0.0431 | 0.9356 | 0.414  | 0.0319 | 0.7942   | 0.0981 |
| Standard deviation     | 0.0143 | 0.0736 | 0.0976 | 0.0196 | 0.1427   | 0.0295 |
| *P-value               |        | 0.0001 | 0.006  | 0.5481 | 0.0018   | 0.0764 |
| #P-value               |        |        | 0.0038 | 0.0001 | 0.281    | 0.0001 |
|                        | 0.3275 | 1.406  | 1.3513 | 0.0283 | 2.1658   | 0.0454 |
| p-Nrf2/ $\beta$ -Actin | 0.7878 | 1.6322 | 1.6677 | 0.2191 | 2.3483   | 0.0365 |
|                        | 0.2288 | 1.1064 | 1.2216 | 0.05   | 1.3332   | 0.0715 |
| Mean value             | 0.448  | 1.3815 | 1.4135 | 0.0991 | 1.9491   | 0.0512 |
| Standard deviation     | 0.2436 | 0.2153 | 0.1874 | 0.0853 | 0.4418   | 0.0149 |
| *P-value               |        | 0.0153 | 0.0113 | 0.1285 | 0.0136   | 0.083  |
| #P-value               |        |        | 0.8818 | 0.0014 | 0.1778   | 0.001  |
|                        | 0.6638 | 0.608  | 0.4502 | 0.546  | 0.5239   | 0.4735 |
| Nrf2/ $\beta$ -Actin   | 0.7583 | 0.4122 | 0.5823 | 0.507  | 0.6595   | 0.6578 |
|                        | 0.6603 | 0.9938 | 0.5862 | 0.7272 | 0.7864   | 0.6981 |
| Mean value             | 0.6942 | 0.6714 | 0.5396 | 0.5934 | 0.6566   | 0.6098 |
| Standard deviation     | 0.0454 | 0.2416 | 0.0632 | 0.0959 | 0.1072   | 0.0978 |
| *P-value               |        | 0.902  | 0.0484 | 0.2506 | 0.6718   | 0.3304 |
| #P-value               |        |        | 0.497  | 0.6934 | 0.9409   | 0.7551 |

\*P-values indicate comparison with control group; #P-values indicate comparison with ADR group. CTR: control, ADR: andrographolide, TBHQ: tert-butylhydroquinone (Nrf2 agonist), RA: retinoic acid (Nrf2 inhibitor).

Table S11 Analysis of grayscale values of each group of strips

| Groups                   | CTR    | ADR    | ADR+AST   | ADR+AST   | ADR+SP60  | ADR+AST          |
|--------------------------|--------|--------|-----------|-----------|-----------|------------------|
|                          |        |        | X029+SP60 | X029+TAK- | 0125+TAK- | X029+SP60        |
|                          |        |        | 0125      | 715       | 715       | 0125+TAK-<br>715 |
|                          | 0.9466 | 0.6272 | 1.1868    | 0.7764    | 0.7417    | 0.9879           |
| p38/ $\beta$ -Actin      | 1.1383 | 1.3749 | 1.0729    | 0.7803    | 0.7316    | 1.0853           |
|                          | 1.9279 | 1.8096 | 1.6302    | 1.5422    | 1.5339    | 1.3830           |
| Mean value               | 1.3376 | 1.2706 | 1.2966    | 1.0329    | 1.0024    | 1.1521           |
| Standard deviation       | 0.4247 | 0.4883 | 0.2404    | 0.3601    | 0.3759    | 0.1681           |
| *P-value                 |        | 0.8907 | 0.9113    | 0.4823    | 0.4503    | 0.5965           |
| #P-value                 |        |        | 0.9493    | 0.6091    | 0.5715    | 0.7618           |
|                          | 0.3305 | 1.0520 | 1.4450    | 0.2850    | 0.2657    | 0.3791           |
| p-p38/ $\beta$ -Actin    | 0.1429 | 1.3349 | 1.0540    | 0.1659    | 0.1945    | 0.2345           |
|                          | 0.3404 | 2.5288 | 2.1604    | 0.6103    | 0.6422    | 0.5441           |
| Mean value               | 0.2713 | 1.6386 | 1.5531    | 0.3537    | 0.3675    | 0.3859           |
| Standard deviation       | 0.0908 | 0.6400 | 0.4581    | 0.1878    | 0.1964    | 0.1265           |
| *P-value                 |        | 0.0403 | 0.0178    | 0.6060    | 0.5636    | 0.3567           |
| #P-value                 |        |        | 0.8854    | 0.0528    | 0.0549    | 0.0532           |
|                          | 1.0449 | 0.8977 | 1.4019    | 0.9458    | 0.7725    | 1.1594           |
| Erk1/2/ $\beta$ -Actin   | 0.9630 | 0.6857 | 0.5684    | 0.5083    | 0.4403    | 0.7165           |
|                          | 1.6345 | 1.6950 | 2.1521    | 1.6959    | 2.1460    | 1.8201           |
| Mean value               | 1.2141 | 1.0928 | 1.3742    | 1.0500    | 1.1196    | 1.2320           |
| Standard deviation       | 0.2991 | 0.4345 | 0.6469    | 0.4904    | 0.7383    | 0.4535           |
| *P-value                 |        | 0.7613 | 0.7667    | 0.7068    | 0.8748    | 0.9651           |
| #P-value                 |        |        | 0.6365    | 0.9309    | 0.9669    | 0.7695           |
|                          | 0.2061 | 1.1687 | 0.2794    | 0.2452    | 0.8947    | 0.1842           |
| p-Erk1/2/ $\beta$ -Actin | 0.1692 | 1.3595 | 0.2817    | 0.2400    | 0.9833    | 0.3279           |
|                          | 0.2710 | 2.5623 | 0.4113    | 0.3400    | 1.5627    | 0.3040           |
| Mean value               | 0.2154 | 1.6968 | 0.3241    | 0.2750    | 1.1469    | 0.2720           |
| Standard deviation       | 0.0421 | 0.6169 | 0.0617    | 0.0459    | 0.2963    | 0.0629           |
| *P-value                 |        | 0.0276 | 0.1085    | 0.2474    | 0.0117    | 0.3496           |
| #P-value                 |        |        | 0.0351    | 0.0314    | 0.3192    | 0.0314           |
|                          | 1.4529 | 1.1170 | 1.3850    | 0.9833    | 0.9558    | 1.1056           |
| JNK/ $\beta$ -Actin      | 0.7944 | 0.9723 | 0.7106    | 0.6552    | 0.6639    | 1.1766           |
|                          | 1.8759 | 2.3355 | 1.6818    | 1.6920    | 1.9920    | 1.9762           |
| Mean value               | 1.3744 | 1.4749 | 1.2591    | 1.1102    | 1.2039    | 1.4195           |
| Standard deviation       | 0.4450 | 0.6114 | 0.4063    | 0.4327    | 0.5699    | 0.3947           |
| *P-value                 |        | 0.8601 | 0.8001    | 0.5795    | 0.7554    | 0.9199           |

|                        |        |        |        |        |        |        |
|------------------------|--------|--------|--------|--------|--------|--------|
| #P-value               |        |        | 0.6990 | 0.5289 | 0.6703 | 0.9194 |
|                        | 0.5142 | 1.1735 | 0.2661 | 0.7696 | 0.2181 | 0.2538 |
| p-JNK/ $\beta$ -Actin  | 0.2498 | 1.1048 | 0.2314 | 0.9387 | 0.2736 | 0.4402 |
|                        | 0.3911 | 1.9363 | 0.4169 | 1.2160 | 0.4426 | 0.4488 |
| Mean value             | 0.3850 | 1.4049 | 0.3048 | 0.9748 | 0.3114 | 0.3809 |
| Standard deviation     | 0.1080 | 0.3768 | 0.0805 | 0.1840 | 0.0955 | 0.0899 |
| *P-value               |        | 0.0212 | 0.4470 | 0.0174 | 0.5102 | 0.9690 |
| #P-value               |        |        | 0.0156 | 0.2206 | 0.0164 | 0.0202 |
|                        | 1.5366 | 1.0234 | 1.6590 | 0.8543 | 0.8820 | 0.9480 |
| Nrf2/ $\beta$ -Actin   | 0.6039 | 0.8562 | 0.8839 | 0.6690 | 0.6238 | 0.7644 |
|                        | 0.9514 | 1.7219 | 1.2846 | 1.3506 | 1.1246 | 1.0531 |
| Mean value             | 1.0306 | 1.2005 | 1.2758 | 0.9580 | 0.8768 | 0.9218 |
| Standard deviation     | 0.3849 | 0.3750 | 0.3165 | 0.2877 | 0.2045 | 0.1193 |
| *P-value               |        | 0.6780 | 0.5249 | 0.8411 | 0.6439 | 0.7219 |
| #P-value               |        |        | 0.8388 | 0.5082 | 0.3441 | 0.3732 |
|                        | 0.2517 | 1.0548 | 0.8405 | 0.5057 | 0.5435 | 0.3280 |
| p-Nrf2/ $\beta$ -Actin | 0.2618 | 1.2074 | 0.6081 | 0.9366 | 0.6275 | 0.3484 |
|                        | 0.3298 | 2.4772 | 1.4012 | 1.2110 | 0.9596 | 0.3035 |
| Mean value             | 0.2811 | 1.5798 | 0.9499 | 0.8844 | 0.7102 | 0.3266 |
| Standard deviation     | 0.0347 | 0.6376 | 0.3329 | 0.2903 | 0.1797 | 0.0184 |
| *P-value               |        | 0.0452 | 0.0475 | 0.0433 | 0.0295 | 0.1759 |
| #P-value               |        |        | 0.2833 | 0.2331 | 0.1370 | 0.0499 |
|                        | 0.0451 | 1.1603 | 1.3005 | 0.4869 | 0.3946 | 0.7086 |
| HO-1/ $\beta$ -Actin   | 0.0149 | 1.0924 | 0.7189 | 0.4470 | 0.3378 | 0.5155 |
|                        | 0.0538 | 1.1046 | 1.0478 | 0.4492 | 0.6723 | 0.4811 |
| Mean value             | 0.0379 | 1.1191 | 1.0224 | 0.4610 | 0.4682 | 0.5684 |
| Standard deviation     | 0.0167 | 0.0296 | 0.2381 | 0.0183 | 0.1461 | 0.1001 |
| *P-value               |        | 0.0000 | 0.0043 | 0.0000 | 0.0144 | 0.0018 |
| #P-value               |        |        | 0.5993 | 0.0000 | 0.0035 | 0.0017 |

---

\*P-values indicate comparison with CTR group; #P-values indicate comparison with ADR group, CTR: control, ADR: andrographolide, ASTX029: ERK1/2 inhibitor, SP600125: JNK inhibitor, TAK-715: p38 inhibitor.

Table S12 Analysis of grayscale values of each group of strips

| Groups                      | CTR    | SOL    | PRE    | EXP    |
|-----------------------------|--------|--------|--------|--------|
|                             | 0.1452 | 0.1839 | 0.9768 | 1.7446 |
| HO-1/ $\beta$ -Actin        | 0.2004 | 0.1118 | 0.9875 | 1.1661 |
|                             | 0.1505 | 0.1171 | 0.9499 | 1.5923 |
| Mean value                  | 0.1653 | 0.1376 | 0.9714 | 1.5010 |
| Standard deviation          | 0.0249 | 0.0328 | 0.0158 | 0.2448 |
| *P-value                    |        | 0.3950 | 0.0000 | 0.0015 |
| #P-value                    |        |        | 0.0000 | 0.0015 |
| $\text{\$P-value}$          |        |        |        | 0.0379 |
|                             | 0.1789 | 0.1117 | 1.5762 | 3.0818 |
| p-Nrf2/ $\beta$ -Actin      | 0.1179 | 0.0886 | 1.0062 | 2.5691 |
|                             | 0.1326 | 0.0849 | 0.9603 | 3.0487 |
| Mean value                  | 0.1431 | 0.0951 | 1.1809 | 2.8999 |
| Standard deviation          | 0.0260 | 0.0119 | 0.2802 | 0.2343 |
| *P-value                    |        | 0.0761 | 0.0064 | 0.0001 |
| #P-value                    |        |        | 0.0054 | 0.0001 |
| $\text{\$P-value}$          |        |        |        | 0.0026 |
|                             | 1.7175 | 1.0627 | 1.3252 | 1.2865 |
| Nrf2/ $\beta$ -Actin        | 1.8234 | 1.1691 | 1.2849 | 1.3301 |
|                             | 1.0656 | 1.3453 | 1.1696 | 1.4313 |
| Mean value                  | 1.5355 | 1.1924 | 1.2599 | 1.3493 |
| Standard deviation          | 0.3351 | 0.1165 | 0.0660 | 0.0607 |
| *P-value                    |        | 0.2432 | 0.3175 | 0.4825 |
| #P-value                    |        |        | 0.5149 | 0.1664 |
| $\text{\$P-value}$          |        |        |        | 0.2313 |
|                             | 1.7706 | 1.5160 | 0.4796 | 1.0847 |
| Collagen II/ $\beta$ -Actin | 1.7625 | 1.3408 | 0.5585 | 1.0045 |
|                             | 1.6387 | 1.7056 | 0.5008 | 1.0418 |
| Mean value                  | 1.7239 | 1.5208 | 0.5130 | 1.0437 |
| Standard deviation          | 0.0604 | 0.1489 | 0.0333 | 0.0328 |
| *P-value                    |        | 0.1484 | 0.0000 | 0.0002 |
| #P-value                    |        |        | 0.0007 | 0.0115 |
| $\text{\$P-value}$          |        |        |        | 0.0001 |
|                             | 1.0802 | 1.1750 | 0.5259 | 0.8092 |
| Aggrecan/ $\beta$ -Actin    | 1.3352 | 0.9548 | 0.5389 | 0.7895 |
|                             | 1.2484 | 1.1073 | 0.4150 | 0.9077 |
| Mean value                  | 1.2213 | 1.0790 | 0.4933 | 0.8355 |

|                    |        |        |        |        |
|--------------------|--------|--------|--------|--------|
| Standard deviation | 0.1059 | 0.0921 | 0.0556 | 0.0517 |
| *P-value           |        | 0.2250 | 0.0010 | 0.0098 |
| #P-value           |        |        | 0.0015 | 0.0310 |
| §P-value           |        |        |        | 0.0031 |

---

\*P-values indicate comparison with CTR group; #P-values indicate comparison with SOL group; §P-values indicate comparison with PRE group. CTR: control, SOL: solvent, PRE: pressure, EXP: experiment.
